# Supplementary material for: Disrupting ATF4 Expression Mechanisms Provides an Effective Strategy for BRAF-Targeted Melanoma Therapy
Source: PubMed Central journal article supplement — iScience. 2020 Mar 31;23(4):101028. doi: 10.1016/j.isci.2020.101028 (PMC7155235; doi:10.1016/j.isci.2020.101028), 2020-03-31
Supplement: mmc1.pdf [file mmc1.pdf]

iScience, Volume 23

## **Supplemental Information**

**Disrupting ATF4 Expression Mechanisms**

**Provides an Effective Strategy**

**for BRAF-Targeted Melanoma Therapy**

**Ikuko Nagasawa, Masaru Koido, Yuri Tani, Satomi Tsukahara, Kazuhiro  
Kunimasa, and Akihiro Tomida**

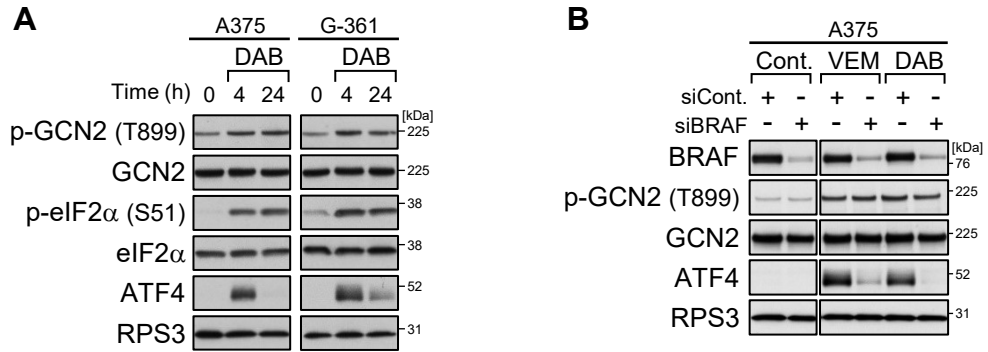

**Figure S1. BRAF kinase inhibitors induce ATF4 expression transiently, related to Figure 1.**

(A) Immunoblot analysis of A375 and G-361 cells treated with dabrafenib (DAB, 1  $\mu$ M) for 4 or 24 h. (B) Immunoblot analysis of A375 and G-361 cells with *BRAF* knockdown by alternative siRNA (Silencer select) and treatment with vemurafenib (VEM, 10  $\mu$ M) or dabrafenib (1  $\mu$ M) for 4 h.

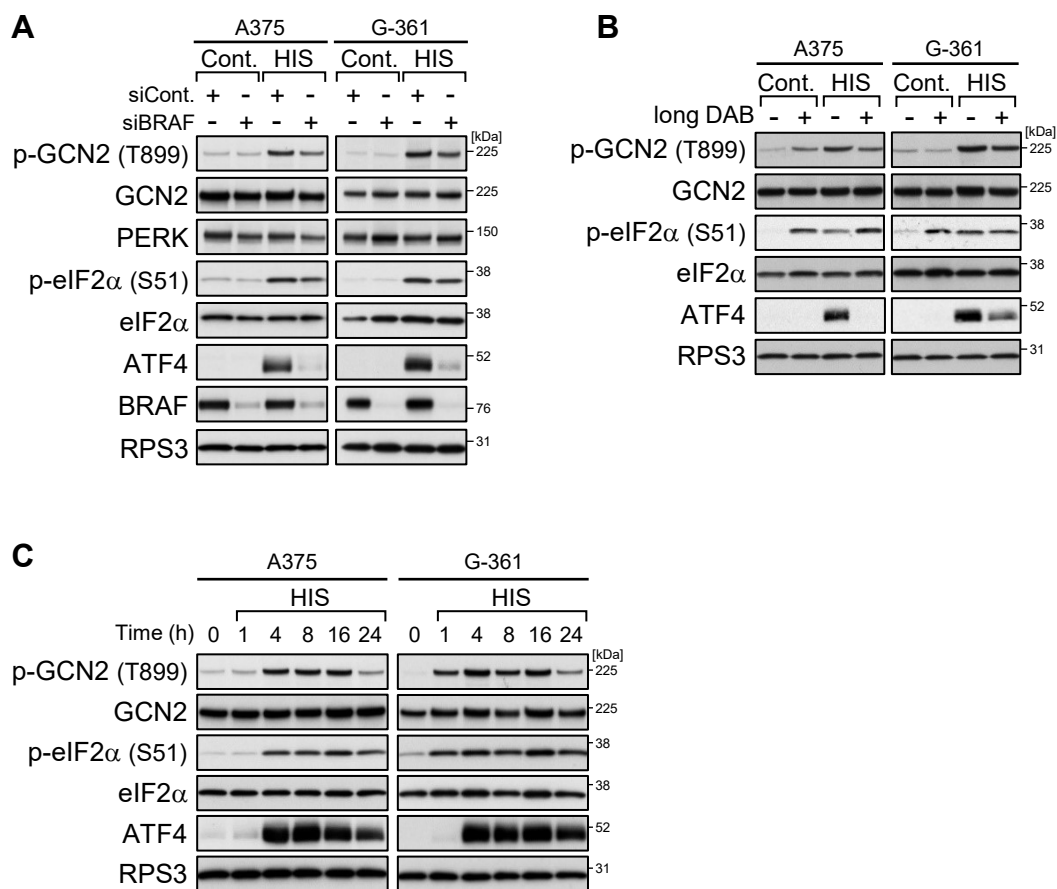

**Figure S2. BRAF depletion or prolonged BRAF kinase inhibition prevents ATF4 induction, related to Figure 2.**

(A) Immunoblot analysis of A375 and G-361 cells with *BRAF* knockdown by alternative siRNA (Silencer select) and treatment with L-histidinol (HIS, 2 mM) for 4 h. (B) Immunoblot analysis of A375 and G-361 cells treated with dabrafenib (DAB, 1 μM) for 24 h and then treated with L-histidinol (2 mM) for 4 h. (C) Immunoblot analysis of A375 and G-361 cells treated with L-histidinol (2 mM) for the indicated times.

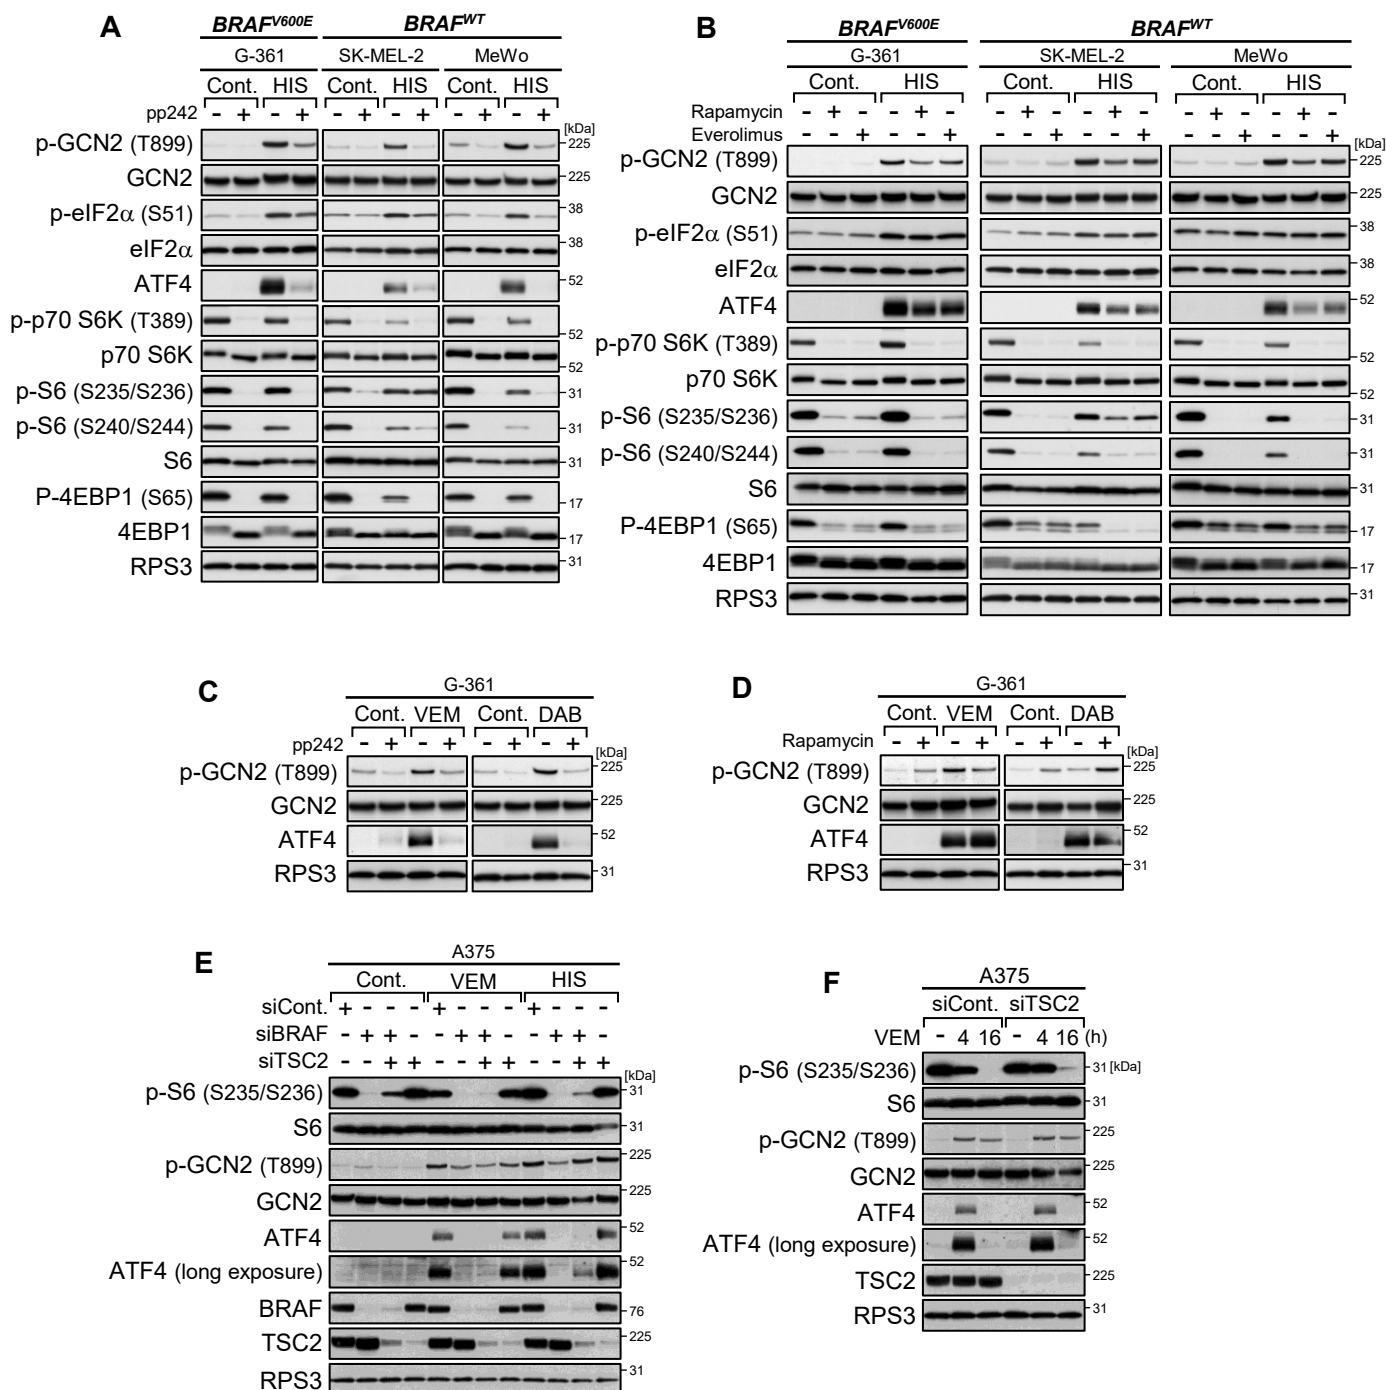

**Figure S3. Oncogenic BRAF utilizes mTOR signaling pathway for ATF4 induction, related to Figure 3.**

(A, B) Immunoblot analysis of the melanoma cell lines treated with L-histidinol (HIS, 2 mM) alone or in combination with pp242 (1 μM) (A) or with rapamycin (0.1 μM) or everolimus (0.1 μM) (B) for 4 h. (C, D) Immunoblot analysis of G-361 cells treated with vemurafenib (VEM, 10 μM) or dabrafenib (DAB, 1 μM) alone or in combination with pp242 (1 μM) (C) or with rapamycin (0.1 μM) (D) for 4 h. (E, F) Immunoblot analysis of A375 cells with *TSC2* knockdown by siRNA (ON-TARGETplus SMARTpool) and treatment with vemurafenib (10 μM) or L-histidinol (2 mM) for 4 h (E) or 16 h.

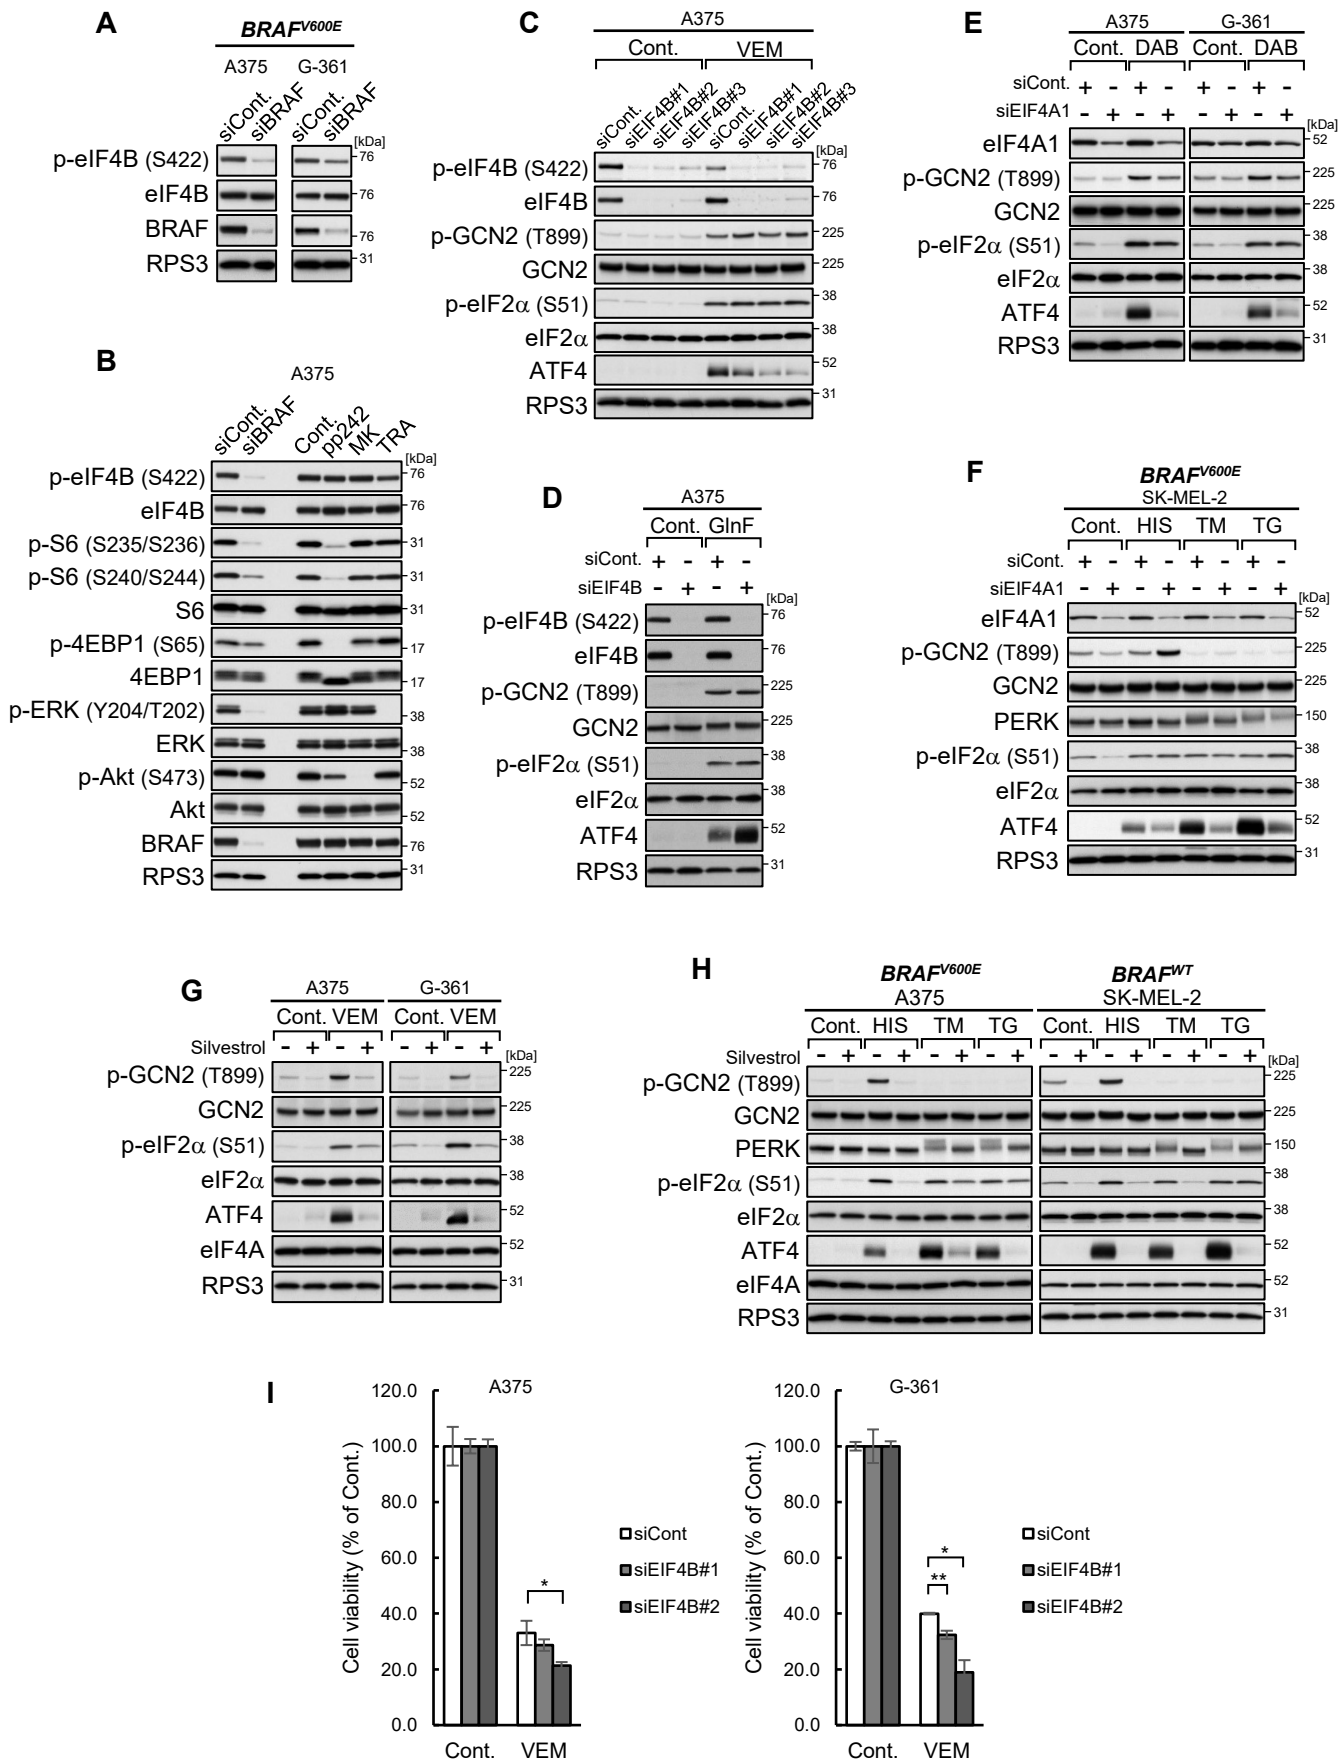

**Figure S4. Oncogenic BRAF enhances eIF4B phosphorylation for ATF4 induction, related to Figure 4.**

(A) Immunoblot analysis of A375 and G-361 cells with *BRAF* knockdown by alternative siRNA (Silencer select). (B) Immunoblot analysis of A375 cells with *BRAF* knockdown or treatment with pp242 (1  $\mu$ M), Akt inhibitor MK-2206 (MK, 1  $\mu$ M), or trametinib (TRA, 0.1  $\mu$ M) for 4 h. (C) Immunoblot analysis of A375 cells with *EIF4B* knockdown by alternative siRNAs (Silencer select) and treatment with vemurafenib (10  $\mu$ M) for 4 h. (D) Immunoblot analysis of A375 cells with *EIF4B* knockdown cultured in glutamine-free (GlnF) medium for 18 h. (E, F) Immunoblot analysis of the melanoma cell lines with *EIF4A1* knockdown and treatment with dabrafenib (DAB, 1  $\mu$ M) (E) or with L-histidinol (HIS, 2 mM), tunicamycin (TM, 1  $\mu$ g/ml), or thapsigargin (TG, 0.3  $\mu$ M) (F) for 4 h. (G, H) Immunoblot analysis of the melanoma cell lines treated with silvestrol (50 nM) alone or in combination with vemurafenib (10  $\mu$ M) (G) or L-histidinol (2 mM), tunicamycin (1  $\mu$ g/ml), or thapsigargin (0.3  $\mu$ M) (H) for 4 h. (I) A375 and G-361 cells were transfected with *EIF4B*-specific siRNA and treated with vemurafenib (10  $\mu$ M) for 48 h. Results are shown as the mean  $\pm$  SD (n=3). The p values were calculated by two-tailed t-test. \*\*p < 0.01, \*p < 0.05. Results are representative of two independent experiments.

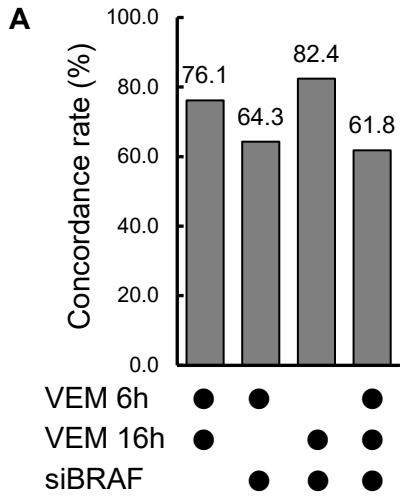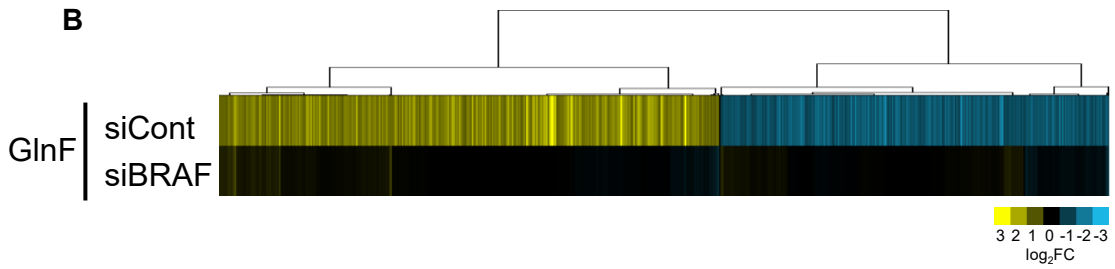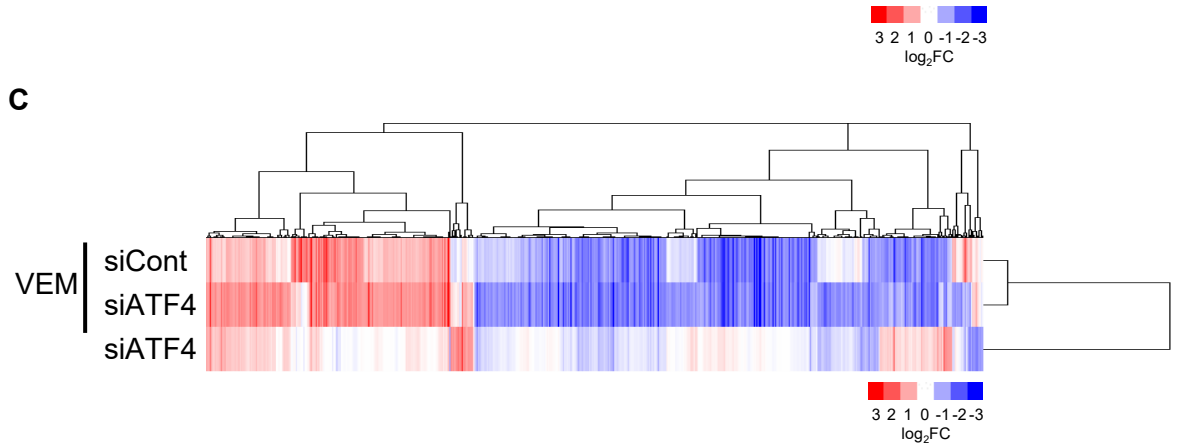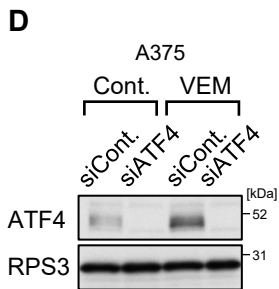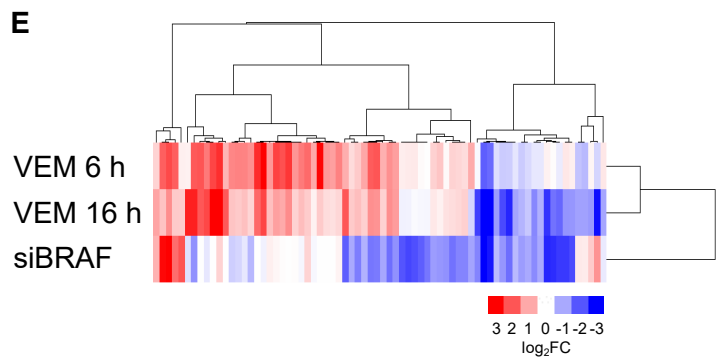

**Figure S5. Expression of ATF4 target genes is influenced by BRAF inhibition, related to Figure 5.**

**(A)** Concordance rates between the BRAF-inhibiting perturbations in Figure 5A. **(B)** Signature of 2,130 probe sets (1,574 genes) that were upregulated or downregulated under glutamine deprivation (GlnF) for 18 h in A375 cells with BRAF knockdown. The log<sub>2</sub> fold change of levels upon glutamine deprivation is shown for each indicated knockdown condition. For probe lists, see Table S3. **(C)** Signature of 1,117 probe sets (781 genes) that were either upregulated or downregulated by treatment with vemurafenib and/or knockdown of *ATF4*. A375 cells were transfected with non-targeting siRNA (siCont) or siRNA specific for *ATF4* and then treated with vemurafenib (VEM, 10 μM) for 4 h. The log<sub>2</sub> fold change of levels under the indicated conditions is shown for the conditions of transfection with nontargeting siRNA (siCont) and treatment with DMSO. For probe lists, see Supplementary Table S4. **(D)** Immunoblot analysis of A375 cells with *ATF4* knockdown and treatment with vemurafenib (10 μM) for 4 h. **(E)** Signature of 72 probe sets (56 genes) that overlapped between probe sets altered by BRAF-inhibiting perturbations (Figure 5A) and probe sets of the BRAFi–ATF4 signature (Figure 5B). For probe lists, see Supplementary Table S6.



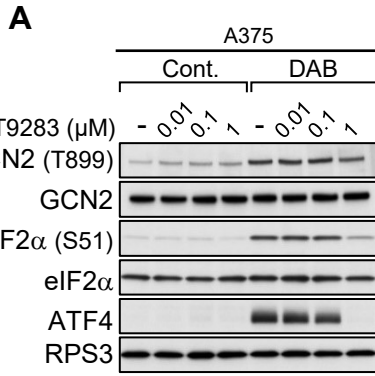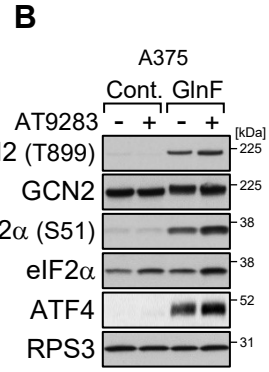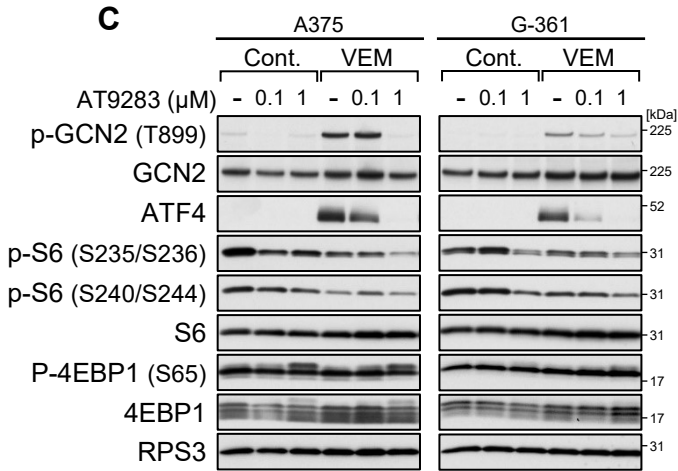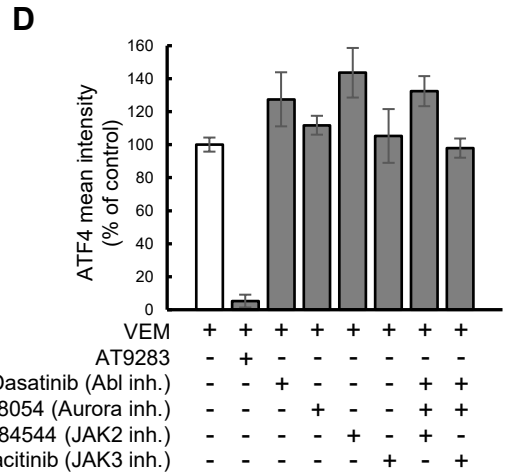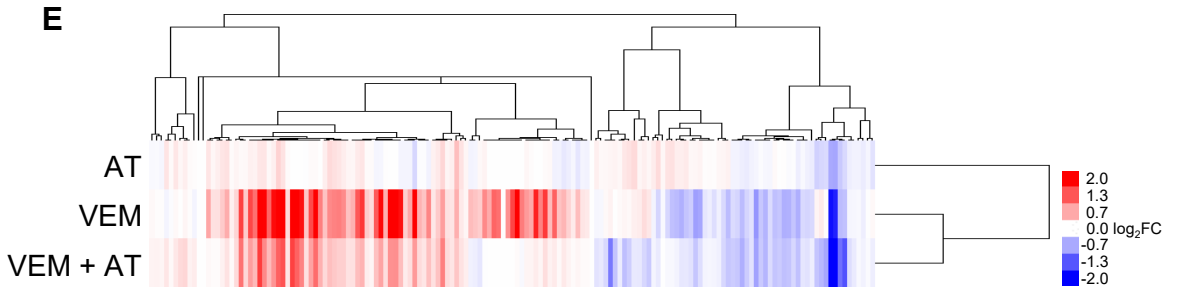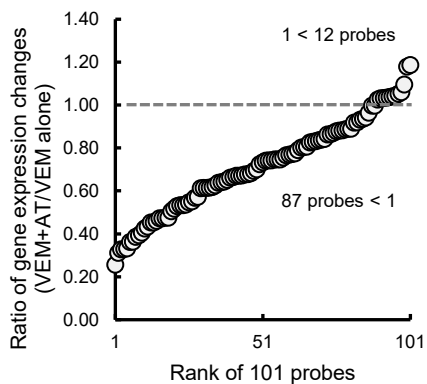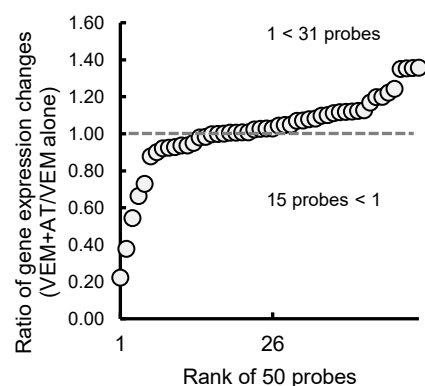

**Figure S6. Identification of a chemical compound that suppresses GCN2–ATF4 pathway activation during BRAF kinase inhibition, related to Figure 6.**

(A) Immunoblot analysis of A375 cells treated with AT9283 alone or in combination with dabrafenib (DAB, 1  $\mu$ M) for 4 h. (B) Immunoblot analysis of A375 cells in the presence of AT9283 (1  $\mu$ M) in glutamine-free (GlnF) medium for 18 h. (C) Immunoblot analysis of A375 and G-361 cells treated with AT9283 alone or in combination with vemurafenib (VEM, 10  $\mu$ M) for 4 h. (D) A375 cells were treated with vemurafenib (10  $\mu$ M) in the presence or absence of AT9283 (1  $\mu$ M), dasatinib (1  $\mu$ M), MLN8054 (1  $\mu$ M), LY2784544 (1  $\mu$ M), tofacitinib (1  $\mu$ M), or their combinations for 6 h. The cells were fixed and stained with anti-ATF4 antibody. Bars represent the quantification of the intensity of ATF4 signals in the nucleus. Results are shown as the mean  $\pm$  SD (n=3). (E) Signature of 155 probe sets (BRAFi–ATF4 signature) under the conditions of treatment with vemurafenib (10  $\mu$ M), AT9283 (0.1  $\mu$ M), or both for 6 h. The log<sub>2</sub> fold change of levels upon treatment with vemurafenib is shown for the condition of treatment with DMSO. Plots represent the ratio of gene expression changes (cotreatment of vemurafenib with AT9283 vs. vemurafenib alone; left panel, rank of 101 probes upregulated by vemurafenib alone; right panel, rank of 50 probes downregulated by vemurafenib alone).

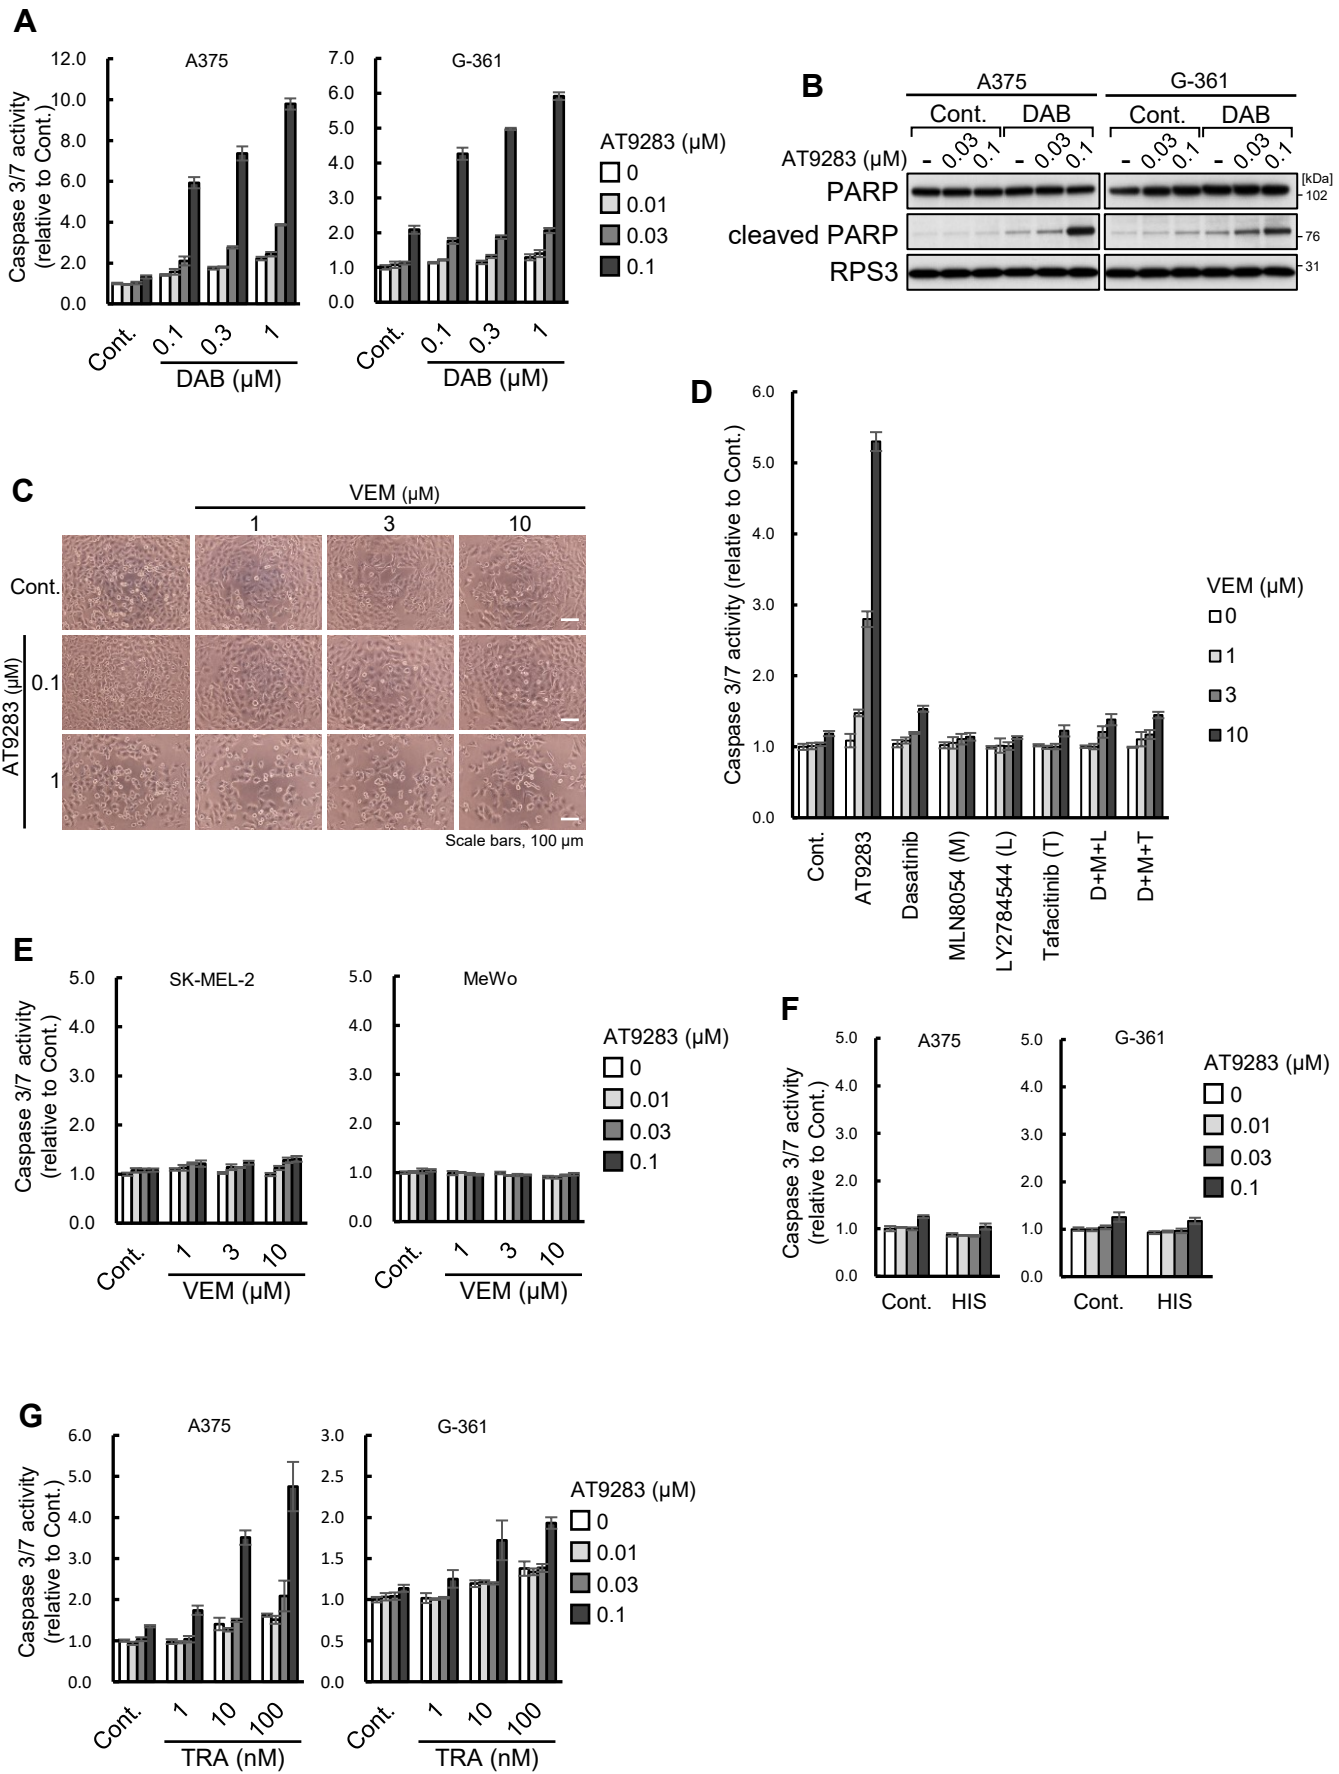

**Figure S7. Enhanced growth inhibition by combined treatments with BRAF inhibitors and AT9283, related to Figure 7.**

(A) A375 and G-361 cells were treated with AT9283 alone or in combination with dabrafenib (DAB) for 16 h. The caspase-3/7 activities were measured by the Caspase-Glo 3/7 assay. Results are shown as the mean  $\pm$  SD (n=3). (B) Immunoblot analysis of A375 and G-361 cells treated with AT9283 alone or in combination with dabrafenib for 16 h. (C) Representative images of A375 cells treated with AT9283 alone or in combination with vemurafenib (VEM) for 16 h. (D) A375 cells were treated with vemurafenib in the presence or absence of AT9283 (0.1  $\mu$ M), dasatinib (0.1  $\mu$ M), MLN8054 (0.1  $\mu$ M), LY2784544 (0.1  $\mu$ M), tofacitinib (0.1  $\mu$ M), or their combinations for 16 h. The caspase-3/7 activities were measured by the Caspase-Glo 3/7 assay. Results are shown as the mean  $\pm$  SD (n=3). (E–G) The melanoma cell lines were treated with AT9283 alone or in combination with vemurafenib (E), L-histidinol (HIS, 2 mM) (F), or trametinib (TRA) (G) for 16 h. The caspase-3/7 activities were measured by the Caspase-Glo 3/7 assay. Results are shown as the mean  $\pm$  SD (n=3).

## TRANSPARENT METHODS

### Cell lines, Reagents, and Software

| Cell lines | Source | Catalog number |
|------------|--------|----------------|
| A375       | ATCC   | CRL-1619       |
| G-361      | ATCC   | CRL-1424       |
| SK-MEL-2   | ATCC   | HTB-68         |
| MeWo       | ATCC   | HTB-65         |
| HEK293T    | ATCC   | CRL-3216       |

| Antibodies                                                          | Source                    | Catalog number |
|---------------------------------------------------------------------|---------------------------|----------------|
| Rabbit monoclonal anti-phospho-eIF2 $\alpha$ (Ser51)                | Cell Signaling Technology | # 3398         |
| Rabbit monoclonal anti-ATF4                                         | Cell Signaling Technology | # 11815        |
| Rabbit anti-GCN2                                                    | Cell Signaling Technology | # 3302         |
| Rabbit monoclonal anti-phospho-p44/42 MAPK (Erk1/2) (Thr202/Tyr204) | Cell Signaling Technology | # 4370         |
| Rabbit monoclonal anti-p44/42 MAPK (Erk1/2)                         | Cell Signaling Technology | # 4695         |
| Rabbit monoclonal anti-phospho-Akt (Ser473)                         | Cell Signaling Technology | # 4060         |
| Rabbit monoclonal anti-Akt (pan)                                    | Cell Signaling Technology | # 4685         |
| Rabbit monoclonal anti-phospho-p70 S6 Kinase (Thr389)               | Cell Signaling Technology | # 9234         |
| Rabbit anti-p70 S6 Kinase                                           | Cell Signaling Technology | # 9202         |
| Rabbit anti-phospho-S6 Ribosomal Protein (Ser235/236)               | Cell Signaling Technology | # 2211         |
| Rabbit anti-phospho-S6 Ribosomal Protein (Ser240/244)               | Cell Signaling Technology | # 2215         |
| Rabbit monoclonal anti-S6 Ribosomal Protein                         | Cell Signaling Technology | # 2217         |
| Rabbit monoclonal anti-TSC2                                         | Cell Signaling Technology | #4308          |
| Rabbit monoclonal anti-phospho-4E-BP1 (Ser65)                       | Cell Signaling Technology | # 9456         |

|                                                                          |                           |          |
|--------------------------------------------------------------------------|---------------------------|----------|
| Rabbit monoclonal anti-phospho-4E-BP1                                    | Cell Signaling Technology | # 9644   |
| Rabbit anti-phospho-eIF4B (Ser422)                                       | Cell Signaling Technology | # 3591   |
| Rabbit anti-eIF4B                                                        | Cell Signaling Technology | # 3592   |
| Rabbit anti-eIF4A1                                                       | Cell Signaling Technology | # 2490   |
| Rabbit monoclonal anti-cleaved PARP (Asp214)                             | Cell Signaling Technology | # 5625   |
| Rabbit monoclonal anti-PARP                                              | Cell Signaling Technology | # 9532   |
| Rabbit monoclonal anti-phospho-Stat3 (Tyr705)                            | Cell Signaling Technology | # 9145   |
| Rabbit anti-Stat3                                                        | Cell Signaling Technology | # 9132   |
| Rabbit anti-Ribosomal Protein L7a                                        | Cell Signaling Technology | # 2403   |
| Rabbit monoclonal anti-Ribosomal Protein S3                              | Cell Signaling Technology | # 9538   |
| Rabbit monoclonal anti-phospho-GCN2 (Thr899)                             | Abcam                     | ab75836  |
| Rabbit anti-PERK                                                         | Abcam                     | ab65142  |
| Mouse monoclonal anti-EIF2S1                                             | Abcam                     | ab5369   |
| Mouse monoclonal anti-Raf-B                                              | Santa Cruz Biotechnology  | sc-55522 |
| Mouse monoclonal anti-B-Raf (V600E)                                      | NewEast Biosciences       | # 26039  |
| Mouse monoclonal anti-FLAG                                               | Sigma-Aldrich             | F3165    |
| Goat anti-Rabbit IgG (H+L) Secondary Antibody, Alexa Fluor 488 conjugate | Thermo Fisher Scientific  | A-11034  |

| <b>Chemicals</b> | <b>Source</b> | <b>Catalog number</b>    |
|------------------|---------------|--------------------------|
| Vemurafenib      | Selleckchem   | S1267                    |
| Dabrafenib       | Selleckchem   | S2807                    |
| Trametinib       | Selleckchem   | S2673                    |
| AT9283           | Selleckchem   | S1134                    |
| Dasatinib        | Selleckchem   | S1021                    |
| MLN8054          | Selleckchem   | S1100                    |
| LY2784544        | Selleckchem   | S2179                    |
| Tofacitinib      | Selleckchem   | Kinase Inhibitor Library |
| MK-2206          | Selleckchem   | S1078                    |

|                              |                |           |
|------------------------------|----------------|-----------|
| Kinase Inhibitor Library     | Selleckchem    | Z88022    |
| PP242                        | Sigma-Aldrich  | N/A       |
| Rapamycin                    | Sigma-Aldrich  | N/A       |
| Everolimus                   | Sigma-Aldrich  | N/A       |
| L-Histidinol dihydrochloride | Sigma-Aldrich  | H6647     |
| Thapsigargin                 | FUJIFILM Wako  | 205-17283 |
| Tunicamycin                  | Nacalai Tesque | 35638-74  |
| Silvestrol                   | ChemScene      | CS-0543   |

| siRNAs                               | Source                   | Catalog number |
|--------------------------------------|--------------------------|----------------|
| ON-TARGETplus SMARTpool BRAF siRNA   | Dharmacon                | L-003460-00    |
| ON-TARGETplus SMARTpool EIF4B siRNA  | Dharmacon                | L-020179-00    |
| ON-TARGETplus SMARTpool EIF4A1 siRNA | Dharmacon                | L-020178-00    |
| ON-TARGETplus SMARTpool ATF4 siRNA   | Dharmacon                | L-005125-00    |
| ON-TARGETplus SMARTpool TSC2 siRNA   | Dharmacon                | L-003029-00    |
| Silencer Select BRAF siRNA           | Thermo Fisher Scientific | s2080          |
| Silencer Select EIF4B siRNA #1       | Thermo Fisher Scientific | s4573          |
| Silencer Select EIF4B siRNA #2       | Thermo Fisher Scientific | s4574          |
| Silencer Select EIF4B siRNA #3       | Thermo Fisher Scientific | s4575          |

| Plasmid     | Source  | Catalog number |
|-------------|---------|----------------|
| pFLAG-B-Raf | Addgene | 40775          |

| Software            | Reference                                         |                                                                                                                                       |
|---------------------|---------------------------------------------------|---------------------------------------------------------------------------------------------------------------------------------------|
| Cluster 3.0         | de Hoon et al., 2004                              | <a href="http://bonsai.hgc.jp/~mdehoon/software/cluster/software.htm">http://bonsai.hgc.jp/~mdehoon/software/cluster/software.htm</a> |
| DAVID (version 6.8) | Huang da et al., 2009a;<br>Huang da et al., 2009b | <a href="https://david.ncifcrf.gov/">https://david.ncifcrf.gov/</a>                                                                   |

|                                 |                                               |                                                                                                                   |
|---------------------------------|-----------------------------------------------|-------------------------------------------------------------------------------------------------------------------|
| Enrichr                         | Chen et al., 2013; Kuleshov et al., 2016      | <a href="https://amp.pharm.mssm.edu/Enrichr/">https://amp.pharm.mssm.edu/Enrichr/</a>                             |
| GSEA software (version 2.0.14)  | Mootha et al., 2003; Subramanian et al., 2005 | <a href="http://software.broadinstitute.org/gsea/index.jsp">http://software.broadinstitute.org/gsea/index.jsp</a> |
| Java TreeView (version 1.1.6r4) | Saldanha, 2004                                | <a href="http://jtreeview.sourceforge.net/">http://jtreeview.sourceforge.net/</a>                                 |
| R (version 3.3.1)               | N/A                                           | <a href="https://www.r-project.org/">https://www.r-project.org/</a>                                               |
| RMExpress (version 1.0.5)       | Irizarry et al., 2003                         | <a href="http://rmaexpress.mbolstad.com/">http://rmaexpress.mbolstad.com/</a>                                     |

### **Cell culture**

The melanoma cell lines and HEK293T cells were maintained in RPMI1640 (FUJIFILM Wako, Osaka, Japan) supplemented with 10% fetal bovine serum and 100 µg/ml kanamycin. For the glutamine withdrawal, cells were cultured in glutamine-free RPMI1640 (FUJIFILM Wako) supplemented with 10% fetal bovine serum and 100 µg/ml kanamycin.

### **Immunoblot analysis**

Immunoblot analysis was performed as described previously (Saito et al., 2009). Briefly, cell lysates were prepared using SDS lysis buffer (62.5 mM Tris-HCl pH6.8, 2% SDS, 10% glycerol, and 50 mM DTT) and protein concentrations were determined using the Bio-Rad protein assay (Bio-Rad, Hercules, CA, USA). Protein samples were subjected to SDS-PAGE and subsequently transferred onto a nitrocellulose membrane. The specific bands were detected using Western Lightning plus ECL (Perkin Elmer, Waltham, MA, USA).



### **RNA interference**

Silencing of human *BRAF*, *TSC2*, *EIF4B*, *EIF4A1*, and *ATF4* expression was performed using ON-TARGETplus SMARTpool siRNA (Dharmacon, Lafayette, CO, USA) or Silencer Select siRNA (Thermo Fisher Scientific, Waltham, MA, USA) with Lipofectamine RNAiMAX (Thermo Fisher Scientific). ON-TARGETplus SMARTpool and Silencer Select siRNAs were used at 20 and 5 nM, respectively. Cells were transfected with each siRNA, in accordance with the manufacturer's reverse-transfection protocol.

### **Overexpression of BRAF**

For BRAF V600E point mutation in the FLAG-BRAF expression vector, site-directed mutagenesis was carried out using a QuickChange Mutagenesis Kit (Agilent Technologies, Santa Clara, CA, USA). Transient transfections into HEK293T and A375 cells were performed using Lipofectamine 2000 (Thermo Fisher Scientific).

### **Cell viability assay**

Cells were transfected with *EIF4B*-specific siRNA and cultured at  $1 \times 10^3$  (A375) or  $2 \times 10^3$  (G-361) cells/well in a 96-well plate. After 24 h, the cells were treated with vemurafenib for 48 h. For cell regrowth assay, the cells were seeded at  $5 \times 10^3$  (A375) or  $1 \times 10^4$  (G-361) cells/well in a 96-well plate and treated with AT9283, vemurafenib, or both for 16 h. The cells were reseeded to a new 96-well plate and cultured in drug-free medium for 96 h. Cell viability was determined by the CellTiter-Glo luminescent cell viability assay (Promega, Madison, WI, USA) based on quantification of the ATP content.

### **Chemical screening**

A375 cells were seeded at  $8 \times 10^3$  cells/well in a 96-well plate and treated with each compound (2  $\mu$ M) from the Kinase Inhibitor Library (355 kinase inhibitors, Selleck) in combination with vemurafenib (10  $\mu$ M) for 6 h. The cells were fixed and subjected to fluorescent immunostaining using anti-ATF4 antibody as described below.

### **Fluorescent immunostaining**

A375 cells ( $8 \times 10^3$  cells/well in a 96-well plate) were treated with vemurafenib, L-histidinol, or tunicamycin in the presence or absence of kinase inhibitors for 6 h. For comparison of the effects of AT9283, dasatinib, MLN8054, LY2784544, and tofacitinib, cells were treated with each compound at 1  $\mu$ M, a concentration enough to inhibit each target kinase activity, based on the previous reports (Flanagan et al., 2010; Howard et al., 2009; Ma et al., 2013; Manfredi et al., 2007; O'Hare et al., 2005). The cells were subjected to fluorescent immunostaining using anti-ATF4 antibody, as described previously (Nagasawa et al., 2017). Fluorescent images were acquired by IN Cell Analyzer 6000 (GE Healthcare, Chicago, IL, USA). Quantification of ATF4 intensity in the nucleus was performed using IN Cell Developer Toolbox software (GE Healthcare).

### **Caspase-3/7 activity assay**

Cells were seeded at  $5 \times 10^3$  (A375) or  $1 \times 10^4$  (G-361) cells/well in a 96-well plate and treated with vemurafenib, L-histidinol, or trametinib in the presence or absence of AT9283, dasatinib, MLN8054, LY2784544, tofacitinib, or their combinations for 16 h. The caspase-3/7 activities were measured by the Caspase-Glo 3/7 assay (Promega).

### **Colony formation assay**

A375 and G-361 cells were treated with AT9283, vemurafenib, or both for 16 h, and then reseeded in six-well plates (A375:  $1 \times 10^3$  cells/well, G361:  $2 \times 10^3$  cells/well). After 7 (A375) or 14 (G-361) days, the colonies were stained with crystal violet.

### **Microarray**

Microarray analysis was carried out as described previously (Saito et al., 2009). The data were normalized by the Robust Multichip Average method using RMAExpress 1.0.5 (Irizarry et al., 2003). Probes with a signal intensity value of  $< 50$  were treated as having a fixed value of 50 (Mashima et al., 2015). Signatures of gene sets were selected using the signal intensity ratio relative to each control sample as follows: probes with fold change  $> 1.5$  ( $< 0.75$ ) are upregulated (downregulated) ones in Figure 6E; probe with fold change  $> 2$  ( $< 0.5$ ) are upregulated (downregulated) ones for other signatures. Control samples are described in each figure legend. Clustering analysis was performed using the correlation-based distance and complete linkage method by Cluster 3.0 software (de Hoon et al., 2004) and visualized by Java TreeView (Saldanha, 2004). Gene Ontology analysis was performed using DAVID (National Institute of Allergy and Infectious Diseases, NIH, MD, USA) with the default parameters (Huang da et al., 2009a, b) and Enrichr (Chen et al., 2013; Kuleshov et al., 2016).

### **TCGA analysis**

Preprocessed RNA-sequenced transcriptome data and BRAF mutation status of skin cutaneous melanoma (SKCM; 472 donors), including primary and metastasis tumors, were obtained from The Cancer Genome Atlas (TCGA) (Broad Institute TCGA Genome

Data Analysis Center (2016): Firehose stddata\_2016\_01\_28 run; Broad Institute of MIT and Harvard; doi:10.7908/C11G0KM9) (2015) via the cBioPortal (Cerami et al., 2012; Gao et al., 2013) website (downloaded on 3/26/2017). For log<sub>2</sub>-scaled expression levels of each gene, we calculated the regression coefficients of BRAF V600\* mutation status including V600E, V600G, V600M, V600V, and V600\_K601delinsE (166 donors) by regressing out the covariate of NRAS or NF1 mutation status (138 donors), which are mutually exclusive with BRAF mutations. We established rankings of genes in descending order of the fitted coefficients for prerank mode of GSEA analysis with  $1 \times 10^4$  permutations (Mootha et al., 2003; Subramanian et al., 2005). From the BRAFi–ATF4 signature, we excluded *ATF4* and genes that were not included in the TCGA transcriptome data set and tested the enrichment of the remaining 107 genes. For such processing, we used the statistical computing language R (<https://www.r-project.org/>; version 3.3.1).

### **Data and Software Availability**

The accession number for the microarray data reported in this paper is National Center for Biotechnology Information Gene Expression Omnibus: GSE136615.

### **Statistics**

Data are presented as mean  $\pm$  S.D. from at least three independent experiments.

## SUPPLEMENTAL REFERENCES

Cerami, E., Gao, J., Dogrusoz, U., Gross, B.E., Sumer, S.O., Aksoy, B.A., Jacobsen, A., Byrne, C.J., Heuer, M.L., Larsson, E., *et al.* (2012). The cBio cancer genomics portal: an open platform for exploring multidimensional cancer genomics data. *Cancer Discov* 2, 401-404.

Chen, E.Y., Tan, C.M., Kou, Y., Duan, Q., Wang, Z., Meirelles, G.V., Clark, N.R., and Ma'ayan, A. (2013). Enrichr: interactive and collaborative HTML5 gene list enrichment analysis tool. *BMC bioinformatics* 14, 128.

de Hoon, M.J., Imoto, S., Nolan, J., and Miyano, S. (2004). Open source clustering software. *Bioinformatics (Oxford, England)* 20, 1453-1454.

Flanagan, M.E., Blumenkopf, T.A., Brissette, W.H., Brown, M.F., Casavant, J.M., Shang-Poa, C., Doty, J.L., Elliott, E.A., Fisher, M.B., Hines, M., *et al.* (2010). Discovery of CP-690,550: a potent and selective Janus kinase (JAK) inhibitor for the treatment of autoimmune diseases and organ transplant rejection. *Journal of medicinal chemistry* 53, 8468-8484.

Gao, J., Aksoy, B.A., Dogrusoz, U., Dresdner, G., Gross, B., Sumer, S.O., Sun, Y., Jacobsen, A., Sinha, R., Larsson, E., *et al.* (2013). Integrative analysis of complex cancer genomics and clinical profiles using the cBioPortal. *Science signaling* 6, p11.

Huang da, W., Sherman, B.T., and Lempicki, R.A. (2009a). Bioinformatics enrichment tools: paths toward the comprehensive functional analysis of large gene lists. *Nucleic acids research* 37, 1-13.

Huang da, W., Sherman, B.T., and Lempicki, R.A. (2009b). Systematic and integrative analysis of large gene lists using DAVID bioinformatics resources. *Nature protocols* 4, 44-57.

Irizarry, R.A., Hobbs, B., Collin, F., Beazer-Barclay, Y.D., Antonellis, K.J., Scherf, U., and Speed, T.P. (2003). Exploration, normalization, and summaries of high density oligonucleotide array probe level data. *Biostatistics (Oxford, England)* 4, 249-264.

Kuleshov, M.V., Jones, M.R., Rouillard, A.D., Fernandez, N.F., Duan, Q., Wang, Z., Koplev, S., Jenkins, S.L., Jagodnik, K.M., Lachmann, A., *et al.* (2016). Enrichr: a comprehensive gene set enrichment analysis web server 2016 update. *Nucleic acids research* 44, W90-97.

Ma, L., Clayton, J.R., Walgren, R.A., Zhao, B., Evans, R.J., Smith, M.C., Heinz-Taheny, K.M., Kreklau, E.L., Bloem, L., Pitou, C., *et al.* (2013). Discovery and characterization of LY2784544, a small-molecule tyrosine kinase inhibitor of JAK2V617F. *Blood cancer journal* 3, e109.

Manfredi, M.G., Ecsedy, J.A., Meetze, K.A., Balani, S.K., Burenkova, O., Chen, W.,

Galvin, K.M., Hoar, K.M., Huck, J.J., LeRoy, P.J., *et al.* (2007). Antitumor activity of MLN8054, an orally active small-molecule inhibitor of Aurora A kinase. *Proceedings of the National Academy of Sciences of the United States of America* *104*, 4106-4111.

Mashima, T., Ushijima, M., Matsuura, M., Tsukahara, S., Kunimasa, K., Furuno, A., Saito, S., Kitamura, M., Soma-Nagae, T., Seimiya, H., *et al.* (2015). Comprehensive transcriptomic analysis of molecularly targeted drugs in cancer for target pathway evaluation. *Cancer science* *106*, 909-920.

Mootha, V.K., Lindgren, C.M., Eriksson, K.F., Subramanian, A., Sihag, S., Lehar, J., Puigserver, P., Carlsson, E., Ridderstrale, M., Laurila, E., *et al.* (2003). PGC-1alpha-responsive genes involved in oxidative phosphorylation are coordinately downregulated in human diabetes. *Nature genetics* *34*, 267-273.

O'Hare, T., Walters, D.K., Stoffregen, E.P., Jia, T., Manley, P.W., Mestan, J., Cowan-Jacob, S.W., Lee, F.Y., Heinrich, M.C., Deininger, M.W., *et al.* (2005). In vitro activity of Bcr-Abl inhibitors AMN107 and BMS-354825 against clinically relevant imatinib-resistant Abl kinase domain mutants. *Cancer research* *65*, 4500-4505.

Saito, S., Furuno, A., Sakurai, J., Sakamoto, A., Park, H.R., Shin-Ya, K., Tsuruo, T., and Tomida, A. (2009). Chemical genomics identifies the unfolded protein response as a target for selective cancer cell killing during glucose deprivation. *Cancer research* *69*, 4225-4234.

Saldanha, A.J. (2004). Java Treeview--extensible visualization of microarray data. *Bioinformatics (Oxford, England)* *20*, 3246-3248.

Subramanian, A., Tamayo, P., Mootha, V.K., Mukherjee, S., Ebert, B.L., Gillette, M.A., Paulovich, A., Pomeroy, S.L., Golub, T.R., Lander, E.S., *et al.* (2005). Gene set enrichment analysis: a knowledge-based approach for interpreting genome-wide expression profiles. *Proceedings of the National Academy of Sciences of the United States of America* *102*, 15545-15550.
